# Supplementary material
Source: publisher site journal article supplement (https://www.dovepress.com/article/406253)
Supplement: Supplementary file 1 [file get_supplementary_file.php]

**Tables S1: Sequences of primers for the identification of azithromycin resistance genes**

| Target | Primer | Oligonucleotide sequence ( 5ʹ-3ʹ) | Amplicon size (bp) |
| --- | --- | --- | --- |
| *acrB* | F  R | GCTGGATGAGGTCACGGATT  TTCCAGACCGTTAGGGCG | 397 |
| *mphA* | F  R | GTGAGGAGGAGCTTCGCGAG  TGCCGCAGGACTCGGAGGTC | 403 |
| *mphB* | F  R | GATATTAAACAAGTAATCAGAATAG  GCTCTTACTGCATCCATACG | 494 |
| *ermA* | F  R | TCTAAAAAGCATGTAAAAGAAA  CGATACTTTTTGTAGTCCTTC | 533 |
| *ermB* | F  R | GAAAAAGTACTCAACCAAATA  AATTTAAGTACCGTTACT | 639 |
| *ermC* | F  R | TCAAAACATAATATAGATAAA  GCTAATATTGTTTAAATCGTCAAT | 642 |
| *ereA* | F  R | GCCGGTGCTCATGAACTTGAG  CGACTCTATTCGATCAGAGGC | 420 |
| *ereB* | F  R | TTGGAGATACCCAGATTGTAG  GAGCCATAGCTTCAACGC | 537 |
| *mefA* | F  R | AGTATCATTAATCACTAGTGC  TTCTTCTGGTACTAAAAGTGG | 345 |
| *msrA* | F  R | GCACTTATTGGGGGTAATGG  GTCTATAAGTGCTCTATCGTG | 384 |
| *macA* | F  R | CTGTAAGCTGTGTCATGATCG  CTCACATTGCACAGTTCAAGC | 1308 |

**Table S2: Sequences of primers for the identification of *S.* Typhi and corresponding band sizes of the products**

| Target | Primer | Oligonucleotide sequence ( 5ʹ-3ʹ) | Amplicon size (bp) |
| --- | --- | --- | --- |
| *S.* Typhi | ST F  ST R | GGCAGATATACTTTCGCAGGCA  CCCAGAACCAAATTTGCTTACA | 227 |
| *S.* Typhi XDR | XDR F  XDR R | TGAATGGTTCTGGTCTGGCG  CTAAACCACGACGGCTCAGT | 425 |
| *S.* Typhi H58 | H58 F  H58 R | GGGCTTGATGGCTTCATTAGT  ACAGGTTGTACGCCTTTCCA | 509 |

**Table S3: Sequences of primers for the identification of *ESBLs* genesin *S.* Typhi and corresponding band sizes of the products**

| Target | Primer | Oligonucleotide sequence ( 5ʹ-3ʹ) | Amplicon size (bp) |
| --- | --- | --- | --- |
| *bla*TEM1 | F  R | AACCCTGGTAAATGCTTC  GTATATATGAGTAAACTTGG | 930 |
| *bla*CTX-M-U | F  R | GAACGATATCGCGGTGATCTG ATGTGCAGCACCAGTAAAG | 593 |
| *bla*CTX-M-1 | F  R | CCGTTTCCGCTATTACAAACCGTTG  GGCCCATGGTTAAAAAATCACTGC | 944 |
| *bla*CTX-M-2 | F  R | ATGATGACTCACAGCATTCG  TCCCGACGGCTTTCCGCGTT | 833 |
| *bla*CTX-M-8 | F  R | TTTGCCCGTGCGATTGG  CGACTTTCTGCCTTCTGCTCT | 368 |
| *bla*CTX-M-9 | F  R | ATGGTGACAAAGAGAGTGCA  CCCTTCGGCGATGATTCTC | 870 |
| *bla*CTX-M-15 | F  R | GATGTGCAGCACCAGTAAAG  AACGATATCGCGGTGATCTG | 549 |
| *bla*CTX-M-25 | F  R | CTGGGTGTGGCGTTGATTA TCGTGCCATTGACGTGTT | 213 |

**Table S4: Sequences of primers for the identification of Ciprofloxacin resistancegenesin *S.* Typhi and corresponding band sizes of the products**

| Target | Primer | Oligonucleotide sequence ( 5ʹ-3ʹ) | Amplicon size (bp) |
| --- | --- | --- | --- |
| *qnrS* | F | TATAATGGTAGTCTAGCCC | 722 |
| R | GATGTGTGATTTTAAACG |
| *gyrA* | F | CTTTGAATCCGGGATACAG | 347 |
| R | TTCCATAGACAAGAAAAAGG |
| *gyrB* | F | GAAAAGGGTAAAATAACGG | 345 |
| R | CATCATGATGCCCTGGCCAG |
| *ParC* | F | ATAGGGTATTATCTGCGGC | 275 |
| R | GAATAAACAACGGTTTTACG |
| *ParE* | F | TGCACAGTTGCTGACAATC | 492 |

**Table S5: Sequences of primers for the identification of Co-trimoxazole**

| Target | Primer | Oligonucleotide sequence ( 5ʹ-3ʹ) | Amplicon size (bp) |
| --- | --- | --- | --- |
| *dhfR7* | F | GCAACGTCAGAAAATGGC | 405 |
| R | AAACTGCTCAAAAAGGAAATTGA |
| *sul1* | F | GTATTGCGCCGCTCTTAGAC | 500 |
| R | AGGGTTTCCGAGAAGGTGAT |

**Table S6: Sequences of primers for the identification of Chloramphenicol resistance genes**

| Target | Primer | Oligonucleotide sequence ( 5ʹ-3ʹ) | Amplicon size (bp) |
| --- | --- | --- | --- |
| *catA1* | F | GAAGATCACTTCGCAGAATAA | 1003 |
| R | CAGCAATAGACATAAGCG |

**Table S7: Sequences of primers for the identification of azithromycin resistance genes**

| Target | Primer | Oligonucleotide sequence ( 5ʹ-3ʹ) | Amplicon size (bp) |
| --- | --- | --- | --- |
| *acrB* | F  R | GCTGGATGAGGTCACGGATT  TTCCAGACCGTTAGGGCG | 397 |
| *mphA* | F  R | GTGAGGAGGAGCTTCGCGAG  TGCCGCAGGACTCGGAGGTC | 403 |
| *mphB* | F  R | GATATTAAACAAGTAATCAGAATAG  GCTCTTACTGCATCCATACG | 494 |
| *ermA* | F  R | TCTAAAAAGCATGTAAAAGAAA  CGATACTTTTTGTAGTCCTTC | 533 |
| *ermB* | F  R | GAAAAAGTACTCAACCAAATA  AATTTAAGTACCGTTACT | 639 |
| *ermC* | F  R | TCAAAACATAATATAGATAAA  GCTAATATTGTTTAAATCGTCAAT | 642 |
| *ereA* | F  R | GCCGGTGCTCATGAACTTGAG  CGACTCTATTCGATCAGAGGC | 420 |
| *ereB* | F  R | TTGGAGATACCCAGATTGTAG  GAGCCATAGCTTCAACGC | 537 |
| *mefA* | F  R | AGTATCATTAATCACTAGTGC  TTCTTCTGGTACTAAAAGTGG | 345 |
| *msrA* | F  R | GCACTTATTGGGGGTAATGG  GTCTATAAGTGCTCTATCGTG | 384 |
| *macA* | F  R | CTGTAAGCTGTGTCATGATCG  CTCACATTGCACAGTTCAAGC | 1308 |
